# Supplementary material for: A Combination of DNA-peptide Probes and Liquid Chromatography-Tandem Mass Spectrometry (LC-MS/MS): A Quasi-Targeted Proteomics Approach for Multiplexed MicroRNA Quantification
Source: PubMed Central journal article supplement — Theranostics. 2017 Jul 8;7(11):2849–62. doi: 10.7150/thno.19113 (PMC5562220; doi:10.7150/thno.19113), 2017-07-08
Supplement: thnov07p2849s1.pdf [file thnov07p2849s1.pdf]

**Supporting Information For**  
**A Combination of DNA-peptide Probes and Liquid Chromatography-Tandem**  
**Mass Spectrometry: A Quasi-Targeted Proteomics Approach for Multiplexed**  
**MicroRNA Quantification**

*Feifei Xu<sup>a</sup>, Weixian Zhou<sup>a</sup>, Jianxiang Cao<sup>a</sup>, Qingqing Xu<sup>a</sup>, Dechen Jiang<sup>b</sup>, Yun  
Chen<sup>a,\*</sup>*

<sup>a</sup> School of Pharmacy, Nanjing Medical University, Nanjing, 211166, China

<sup>b</sup> Nanjing University, Nanjing, 210023, China

**Table of Contents:**

Table S1. Predicted mass response of reporter peptides using ESP Predictor

Table S2. Internal standards and the corresponding MRM transitions.

Table S3. Reporter peptides and the corresponding MRM transitions employed.

Table S4. T<sub>m</sub> values of miRNAs estimated using nearest-neighbor method.

Table S5. Accuracy and precision for QC samples.

Table S6. A comparison of miRNA concentrations determined by quasi-targeted proteomics *w* and *w/o* *E. Coli* lysate.

Table S7. Comparison of slopes of calibrations curves measured *w* and *w/o* other miRNAs in high concentration.

Figure S1. Chromatograms of biotinylated miRNAs before and after binding with beads.

Figure S2. Representative calibration curves (1 pM to 100 nM) for target miRNAs.

Figure S3. LC-MS/MS chromatograms for the LLOQ (A) and matrix blank (B).

Figure S4. Calibration curves after crosstalk correction.

Figure S5. Multiplexed detection of the target miRNAs with varying concentrations.

Figure S6. Multiplex quasi-targeted proteomics *vs.* qRT-PCR using breast tumor samples.

- S1. Formation of DNA-peptide probes
- S2. Biotinylation of miRNAs
- S3. In-solution tryptic digestion
- S4. Nearest-neighbor method
- S5. Crosstalk correction
- S6. Result of backward logistic regression analysis

## Supplementary Tables

Table S1. Predicted mass response of reporter peptides using ESP Predictor.

| Peptides   | ESP Predictor Value |
|------------|---------------------|
| AVLGVDPFR  | 0.80                |
| AVVGVDPFR  | 0.78                |
| AVLGDPFR   | 0.76                |
| AVQLGVDPFR | 0.91                |
| AVDLGVDPFR | 0.86                |

Table S2. Internal standards and the corresponding MRM transitions.

| Internal Peptide Standards | MRM Transitions          |
|----------------------------|--------------------------|
| AV*LGVDPFR                 | <i>m/z</i> 495.3 → 419.3 |
| AV*VGVDPFR                 | <i>m/z</i> 488.4 → 419.3 |
| AV*LGDPFR                  | <i>m/z</i> 442.0 → 419.3 |
| AV*QLGV*DPFR               | <i>m/z</i> 559.4 → 698.3 |
| AV*DLGV*DPFR               | <i>m/z</i> 553.0 → 294.2 |

Table S3. Reporter peptides and the corresponding MRM transitions employed.

| Reporter Peptides | MRM transitions          |
|-------------------|--------------------------|
| AVLGVDPFR         | <i>m/z</i> 487.3 → 171.1 |
|                   | <i>m/z</i> 487.3 → 419.3 |
|                   | <i>m/z</i> 487.3 → 690.3 |
| AVVGVDPFR         | <i>m/z</i> 480.4 → 72.0  |
|                   | <i>m/z</i> 480.4 → 171.0 |
|                   | <i>m/z</i> 480.4 → 419.4 |
| AVLGDPFR          | <i>m/z</i> 438.0 → 72.0  |
|                   | <i>m/z</i> 438.0 → 175.0 |
|                   | <i>m/z</i> 438.0 → 419.3 |
| AVQLGVDPFR        | <i>m/z</i> 551.4 → 72.0  |
|                   | <i>m/z</i> 551.4 → 419.1 |
|                   | <i>m/z</i> 551.4 → 690.3 |
| AVDLGVDPFR        | <i>m/z</i> 545.0 → 72.2  |
|                   | <i>m/z</i> 545.0 → 170.8 |
|                   | <i>m/z</i> 545.0 → 286.2 |

Table S4.  $T_m$  values of miRNAs estimated using nearest-neighbor method.

| miRNAs            | Calculated $T_m$ values |
|-------------------|-------------------------|
| <b>miR-21</b>     | 62.5                    |
| <b>miR-let 7a</b> | 63.8                    |
| <b>miR-200c</b>   | 68.8                    |
| <b>miR-125a</b>   | 72.8                    |
| <b>miR-15b</b>    | 66.0                    |

Table S5. Accuracy and precision for QC samples.

| Nominal Concentration     | 1.00 pM | 3.00 pM | 500 pM | 80.0 nM |
|---------------------------|---------|---------|--------|---------|
| <b>miR-21</b>             |         |         |        |         |
| Mean                      | 0.88    | 2.86    | 485    | 82.3    |
| %Bias                     | -12.0   | -4.7    | -3.0   | 2.9     |
| Intra-day Precision (%CV) | 6.7     | 9.7     | 8.4    | 10.7    |
| Inter-day Precision (%CV) | 8.0     | 11.0    | 7.9    | 6.6     |
| <b>miR-15b</b>            |         |         |        |         |
| Mean                      | 0.89    | 2.77    | 478    | 78.1    |
| %Bias                     | -11.0   | -7.7    | -4.4   | -2.4    |
| Intra-day Precision (%CV) | 7.2     | 6.3     | 6.4    | 4.5     |
| Inter-day Precision (%CV) | 8.9     | 9.1     | 7.2    | 5.4     |
| <b>miR-Let 7a</b>         |         |         |        |         |
| Mean                      | 1.09    | 3.13    | 530    | 85.3    |
| %Bias                     | 9.0     | 4.3     | 6.0    | 6.6     |
| Intra-day Precision (%CV) | 5.3     | 5.1     | 4.3    | 6.7     |
| Inter-day Precision (%CV) | 4.6     | 4.6     | 4.9    | 3.7     |
| <b>miR-200c</b>           |         |         |        |         |
| Mean                      | 1.13    | 3.09    | 516    | 83.1    |
| %Bias                     | 13.0    | 3.0     | 3.2    | 3.9     |
| Intra-day Precision (%CV) | 7.9     | 6.4     | 5.6    | 6.5     |
| Inter-day Precision (%CV) | 5.8     | 5.3     | 4.9    | 4.2     |
| <b>miR-125a</b>           |         |         |        |         |
| Mean                      | 0.88    | 2.79    | 477    | 76.9    |
| %Bias                     | -12.0   | -7.0    | -4.6   | -3.9    |
| Intra-day Precision (%CV) | 6.3     | 7.6     | 4.6    | 5.7     |
| Inter-day Precision (%CV) | 6.1     | 5.9     | 5.8    | 6.1     |
| <b>n</b>                  | 18      | 18      | 18     | 18      |
| <b>Number of Runs</b>     | 3       | 3       | 3      | 3       |

Table S6. A comparison of miRNA concentrations determined by quasi-targeted proteomics *w* and *w/o* *E. Coli* lysate.

| Samples                                         | miRNA concentrations (nM) |           |           |           |           |
|-------------------------------------------------|---------------------------|-----------|-----------|-----------|-----------|
|                                                 | miR-21                    | miR-let7a | miR-200c  | miR-125a  | miR-15b   |
| 1 nM each miRNA                                 | 0.98±0.11                 | 0.97±0.13 | 1.07±0.05 | 0.99±0.08 | 1.08±0.02 |
| 1 nM each miRNA<br>+ <i>E. coli</i> cell lysate | 0.95±0.16                 | 0.97±0.11 | 1.01±0.11 | 1.05±0.06 | 1.02±0.07 |

Table S7. Comparison of slopes of calibrations curves measured *w* and *w/o* other miRNAs in high concentration.

| Samples          | Calibration Curve Slopes |               |               |               |               |
|------------------|--------------------------|---------------|---------------|---------------|---------------|
|                  | miR-21                   | miR-let7a     | miR-200c      | miR-125a      | miR-15b□      |
| w/o other miRNAs | 0.906 ± 0.020            | 0.912 ± 0.020 | 0.908 ± 0.019 | 0.894 ± 0.012 | 0.887 ± 0.009 |
| w other miRNAs   | 0.918 ± 0.014            | 0.925 ± 0.010 | 0.914 ± 0.010 | 0.898 ± 0.018 | 0.893 ± 0.009 |
| p value          | 0.42                     | 0.38          | 0.67          | 0.77          | 0.47          |

## Supplementary Figures

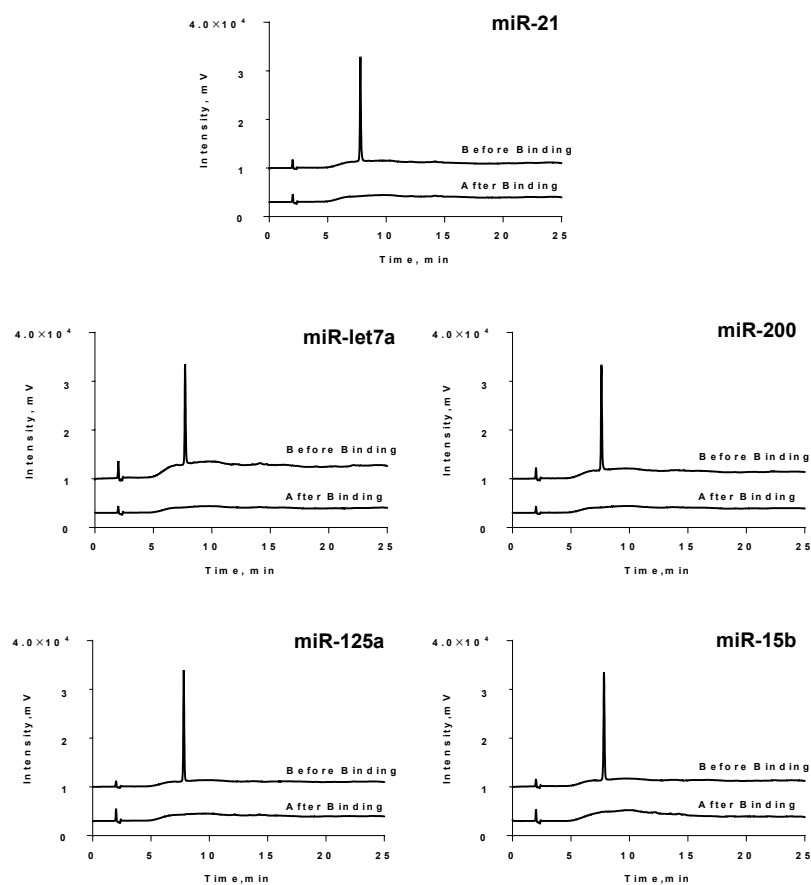

**Figure S1.** Chromatograms of biotinylated target miRNAs before and after binding with streptavidin agarose beads.

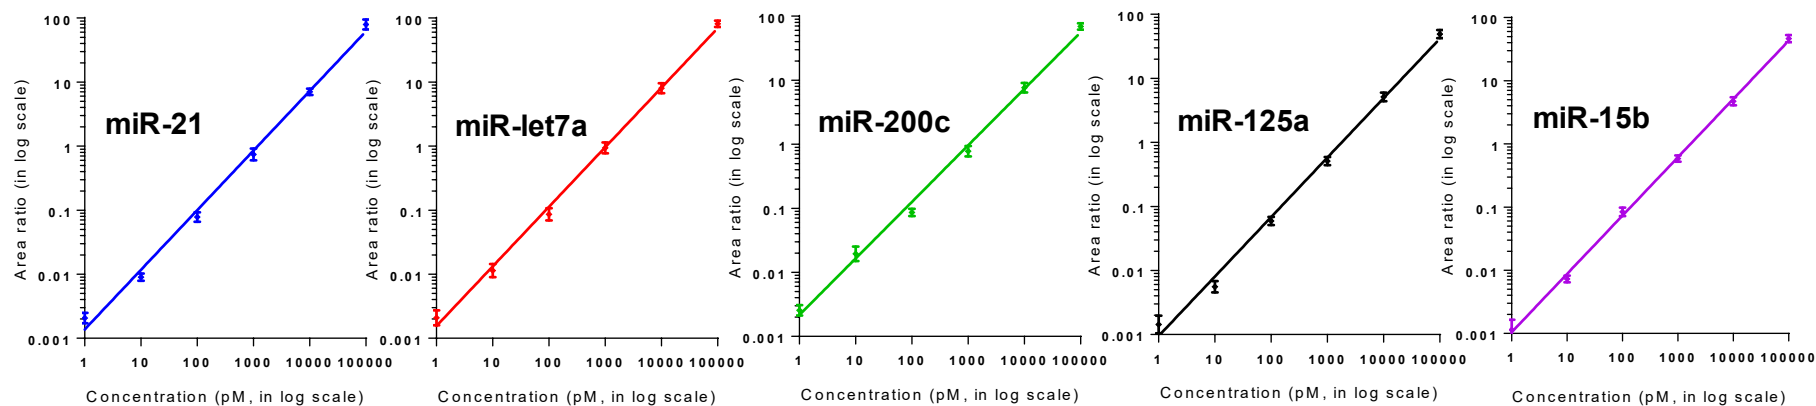

**Figure S2.** Representative calibration curves (1 pM to 100 nM) for target miRNAs. The relative peak area ratio of the reporter peptides and the corresponding stable isotope-labeled internal standards was plotted against concentration.

(A)

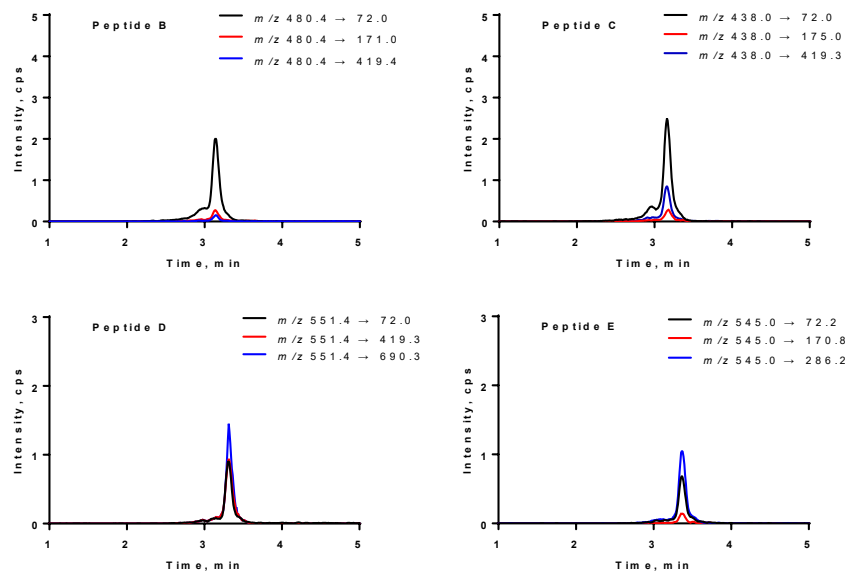

(B)

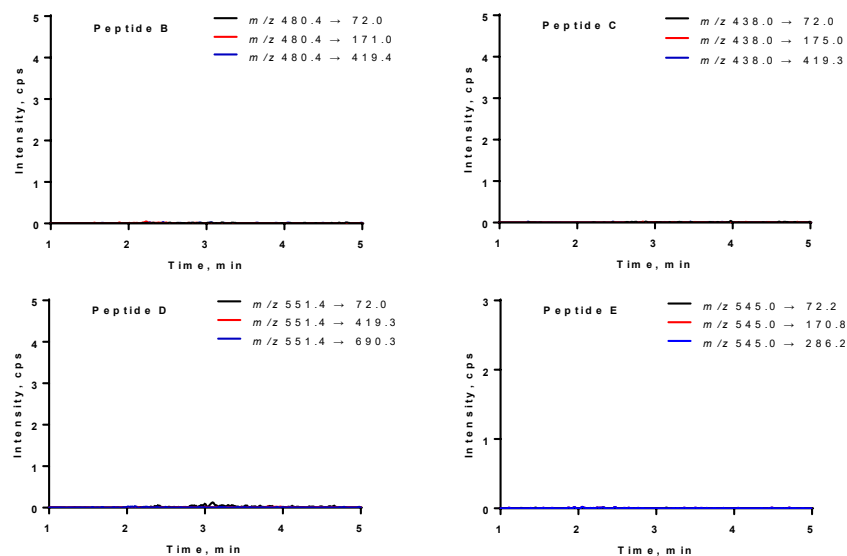

**Figure S3.** LC-MS/MS chromatograms for (A) the LLOQ of reporter peptides and (B) matrix blank. The internal standard is omitted for clarity.

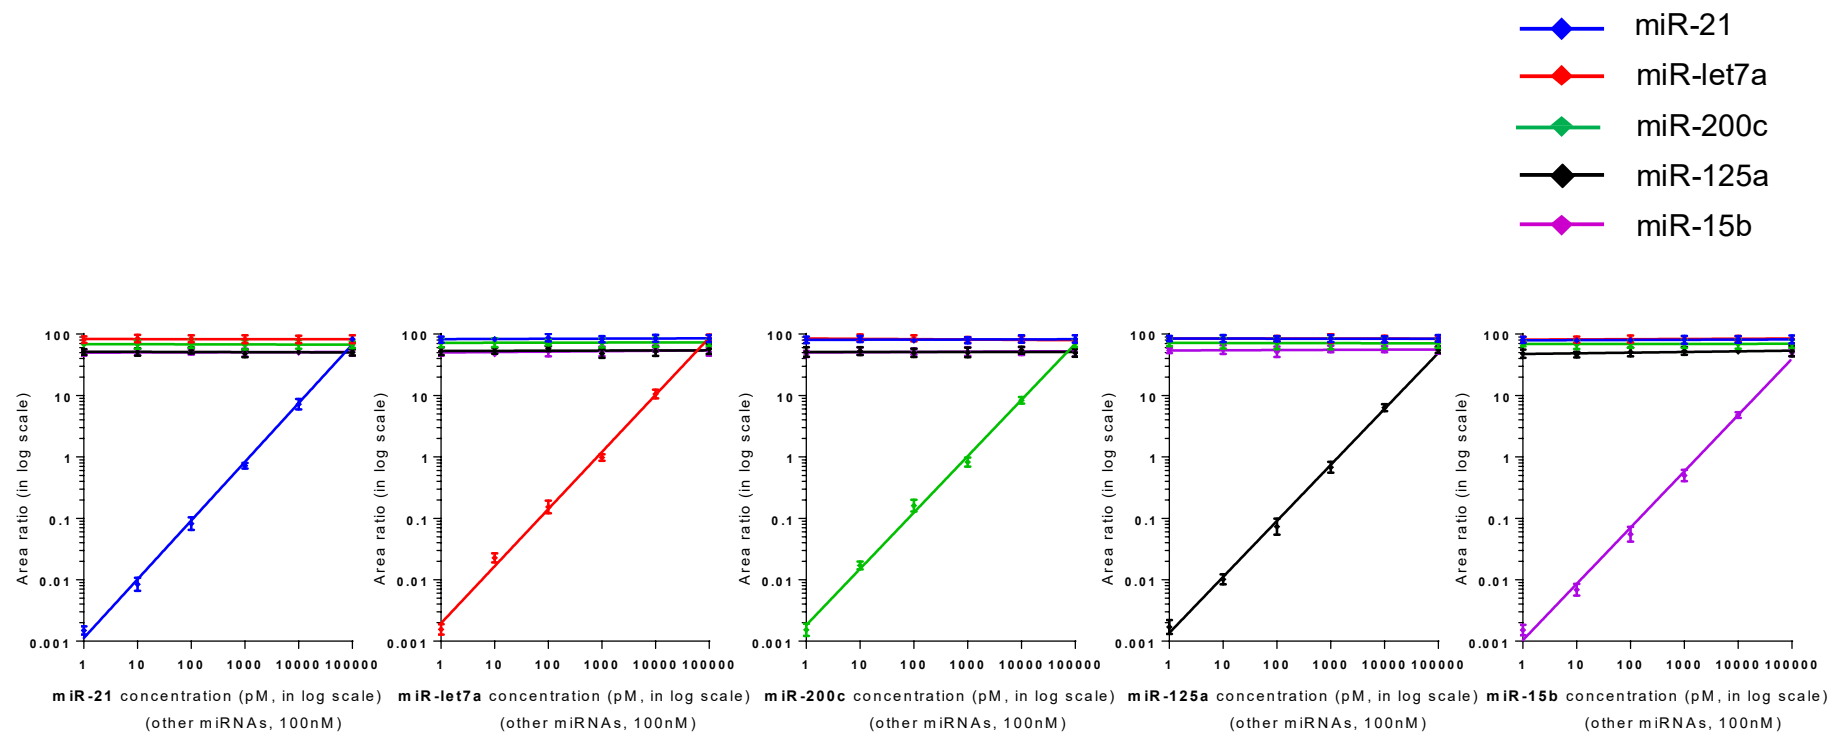

**Figure S4.** Calibration curves after crosstalk correction. The standards contain all five probes and five target miRNAs. One of the miRNAs has an increasing concentration. The other miRNAs have a constant concentration of 100 nM each. Even the presence of other miRNAs at high concentrations does not significantly alter the calibration curves.

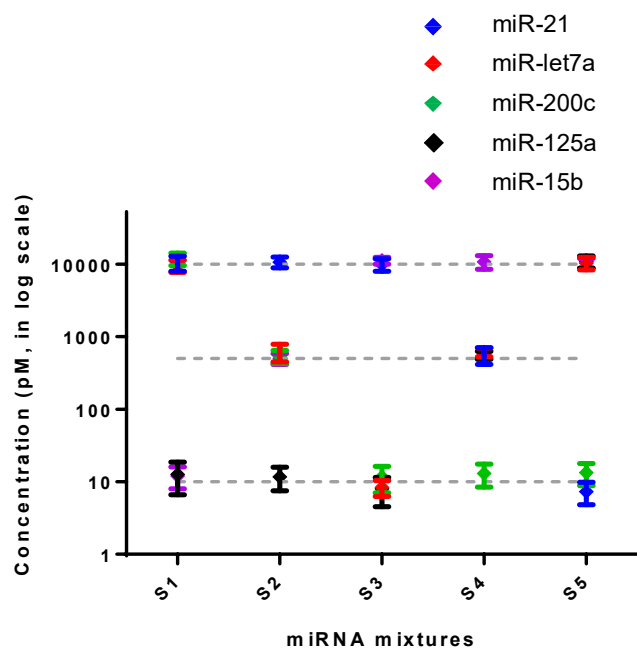

| miRNA mixtures | Concentrations (pM) |           |          |          |         |
|----------------|---------------------|-----------|----------|----------|---------|
|                | miR-21              | miR-let7a | miR-200c | miR-125a | miR-15b |
| <b>S1</b>      | 10000               | 10000     | 10000    | 10       | 10      |
| <b>S2</b>      | 10000               | 500       | 500      | 10       | 500     |
| <b>S3</b>      | 10000               | 10        | 10       | 10       | 10000   |
| <b>S4</b>      | 500                 | 500       | 10       | 500      | 10000   |
| <b>S5</b>      | 10                  | 10000     | 10       | 10000    | 10000   |

**Figure S5.** Multiplexed detection of the target miRNAs with varying concentrations. Five samples (S1 to S5) containing miRNAs with concentrations between 10 pM and 10000 pM were measured and the calculated concentrations after crosstalk correction are shown as filled diamond and bar. Dotted line indicated the theoretical concentrations (i.e., 10 pM, 500 pM and 10000 pM).

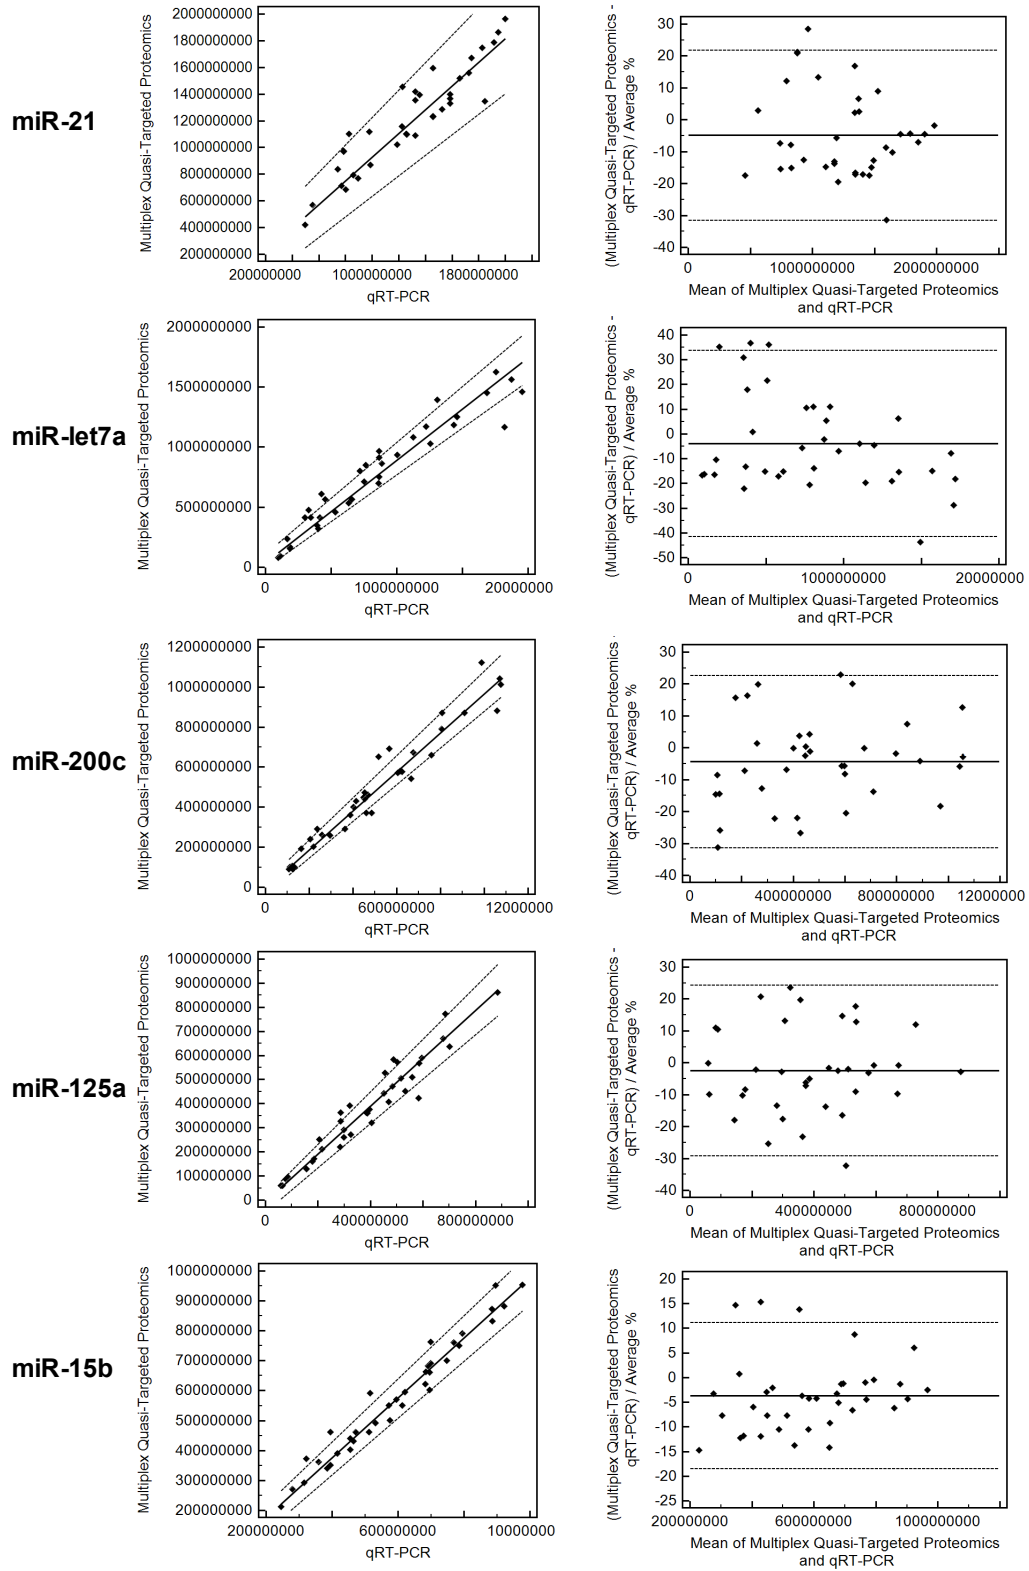

**Figure S6.** Passing-Bablok regression analysis and the corresponding Bland-Altman plot of breast tumor samples for multiplex quasi-targeted proteomics vs. qRT-PCR. The solid line corresponds to the regression line. Dashed lines represent the 95% confidence interval for the regression line in the Passing-Bablok regression plot and

the limits of agreement ( $\pm 1.96 \times$  standard deviation (SD)) in the Bland-Altman plot.

## Supplementary Material

### S1. Formation of DNA-peptide probes

The synthetic DNA contained a disulfide modification on its 3' end that needed to be reduced prior to conjugation. Tris(2-carboxyethyl)-phosphine (TCEP) was used as the reducing agent. 20  $\mu$ L of TCEP reducing beads (Thermo Fisher Scientific, IL, USA) was incubated with 100  $\mu$ L of 2  $\mu$ M DNA at 37°C for 2 h with vigorous shaking. The sample was then centrifuged at  $1000 \times g$  for 5 min, and the supernatant containing the reduced DNA was added to an equal volume of 20  $\mu$ M maleimide-modified substrate peptide. The conjugation reaction was carried out at 37°C for 4 h with vigorous shaking, followed by immediate purification. The DNA-peptide conjugate was isolated from the excess of non-conjugated DNA and peptide by high performance liquid chromatography (HPLC). The HPLC condition was provided in the corresponding figure. Quantification was performed using external calibration peak area measurement.

### S2. Biotinylation of miRNAs

Total RNA was isolated from cells and tissue homogenates using TRIzol<sup>®</sup> Reagent and quantified using a NanoDrop spectrophotometer (Thermo Fisher Scientific Inc., MA, USA). Following the manufacturer's protocol, 100  $\mu$ g of total RNA in a 30  $\mu$ L reaction volume was biotinylated using Pierce<sup>™</sup> RNA 3' End Biotinylation Kit (Thermo Fisher Scientific Inc., MA, USA). Then, 20  $\mu$ L biotinylated RNA was added with an equal volume of streptavidin agarose (Life Technologies, MD, USA) and incubated at 37°C on a shaker for 2 h, followed by washing and centrifugation. Streptavidin agarose was in advance coated with RNase-free BSA and yeast tRNA to prevent non-specific binding of RNA and protein complexes. For each 100  $\mu$ L of beads, 10  $\mu$ L tRNA (10 mg/mL) and 10  $\mu$ L BSA (10 mg/mL) were added.

### S3. In-solution Tryptic Digestion

The streptavidin agarose:biotinylated miRNAs:DNA-peptide complexes were mixed with 100  $\mu\text{L}$  of 50 mM  $\text{NH}_4\text{HCO}_3$ . Subsequently, sequencing grade trypsin was added and the sample was incubated at 37°C for 24 h. The reaction was stopped by adding 10  $\mu\text{L}$  of 0.1% TFA. Then, 100  $\mu\text{L}$  of the internal standard solution was added to the tryptic peptide mixture before transferring it into an Oasis HLB cartridge (60 mg/3 mL; Waters, Milford, MA, USA) that was preconditioned with 3 mL ACN and 3 mL deionized water. After the sample was loaded, the cartridge was washed with 2 mL of water and 2 mL of ACN:water (50:50, v/v) and eluted with 1 mL of 100% ACN. Finally, the eluent was evaporated to dryness, and the sample was resuspended in 100  $\mu\text{L}$  of ACN:water (50:50, v/v) containing 0.1% FA.

#### S4. Nearest-neighbor method

$$T_m = \frac{H}{(A + S) + R \ln(Ct/4)} \times 273.15 + 16.6 \log_{10}[\text{salt}]$$

Where:

□  $H$  ( $\text{cal mole}^{-1}$ ) is the sum of the nearest-neighbor enthalpy changes for hybrid formation ( $< 0$ ).

□  $A$  ( $\text{cal K}^{-1} \text{mole}^{-1}$ ) is a constant for helix initiation which is equal to  $-10.8 \text{ cal K}^{-1} \text{mole}^{-1}$  for non self-complementary sequences and  $-12.4 \text{ cal K}^{-1} \text{mole}^{-1}$  for self-complementary sequences).

□  $S$  ( $\text{cal K}^{-1} \text{mole}^{-1}$ ) is the sum of the nearest-neighbor entropy changes for hybrid formation ( $< 0$ ).

□  $R$  is the molar gas constant ( $1.987 \text{ cal K}^{-1} \text{mole}^{-1}$ ).

□  $Ct$  is the total molar concentration of strands when oligonucleotides are not self complementary or it is equal to 4 times this concentration in the case of self-complementary sequences.

□  $H$  and  $S$  values for nearest neighbor interactions of DNA and RNA have been presented previously

(<http://www.sigmaaldrich.com/technical-documents/articles/biology/oligos-melting-temperature.html>).

#### S5. Crosstalk correction

The relation between the absolute intensities arising from all MRM transitions ( $I_1$ – $I_5$ ) and the real intensities for each single reporter peptide ( $A_1$ – $A_5$ ) can be expressed by Eq. 1, where  $M$  is the 5×5 crosstalk correction matrix consisting of five columns and rows of Fig. 5. Matrix  $M$  can be inverted numerically in order to calculate  $A_1$ – $A_5$  from the measured absolute intensities  $I_1$ – $I_5$  via Eq. 2.

$$\begin{bmatrix} I_1 \\ I_2 \\ I_3 \\ I_4 \\ I_5 \end{bmatrix} = M \bullet \begin{bmatrix} A_1 \\ A_2 \\ A_3 \\ A_4 \\ A_5 \end{bmatrix} \quad \text{Eq.1}$$

$$\begin{bmatrix} A_1 \\ A_2 \\ A_3 \\ A_4 \\ A_5 \end{bmatrix} = M^{-1} \bullet \begin{bmatrix} I_1 \\ I_2 \\ I_3 \\ I_4 \\ I_5 \end{bmatrix} \quad \text{Eq.2}$$

In this study,

$$M = \begin{bmatrix} 1 & 0 & 0 & 0.0131 & 0.0157 \\ 0 & 1 & 0 & 0.0172 & 0.0123 \\ 0 & 0.0152 & 1 & 0.0140 & 0 \\ 0.0133 & 0.0174 & 0.0151 & 1 & 0 \\ 0 & 0.0130 & 0.0156 & 0 & 1 \end{bmatrix}$$

$$M^{-1} = \begin{bmatrix} 1.00 & 4.26 \times 10^{-4} & 4.43 \times 10^{-4} & -1.31 \times 10^{-2} & -1.57 \times 10^{-2} \\ 2.29 \times 10^{-4} & 1.00 & 4.52 \times 10^{-4} & -1.72 \times 10^{-2} & -1.23 \times 10^{-2} \\ 1.83 \times 10^{-4} & -1.50 \times 10^{-2} & 1.00 & -1.37 \times 10^{-2} & 1.81 \times 10^{-4} \\ -1.33 \times 10^{-2} & -1.72 \times 10^{-2} & -1.51 \times 10^{-2} & 1.00 & 4.20 \times 10^{-4} \\ -5.83 \times 10^{-6} & -1.28 \times 10^{-2} & -1.56 \times 10^{-2} & 4.38 \times 10^{-4} & 1.00 \end{bmatrix}$$

#### S6. Result of backward logistic regression analysis

## Logistic regression

|             |                                |
|-------------|--------------------------------|
| Dependent Y | Breast_Cancer<br>Breast Cancer |
|-------------|--------------------------------|

|                       |          |
|-----------------------|----------|
| Method                | Backward |
| Enter variable if P<  | 0.05     |
| Remove variable if P> | 0.1      |

|                |             |
|----------------|-------------|
| Sample size    | 72          |
| Cases with Y=0 | 36 (50.00%) |
| Cases with Y=1 | 36 (50.00%) |

### Overall Model Fit

|                              |            |
|------------------------------|------------|
| Null model -2 Log Likelihood | 99.813     |
| Full model -2 Log Likelihood | 27.280     |
| Chi-squared                  | 72.534     |
| DF                           | 3          |
| Significance level           | P < 0.0001 |

### Coefficients and Standard Errors

| Variable  | Coefficient          | Std. Error           | P      |
|-----------|----------------------|----------------------|--------|
| miR_21    | 8.2105807197666E-009 | 2.6083428839936E-009 | 0.0016 |
| miR_let7a | -2.172042958657E-009 | 1.0875124515593E-009 | 0.0458 |
| miR_15b   | 6.6093465573157E-009 | 2.6732488230533E-009 | 0.0134 |
| Constant  | -7.4015              |                      |        |

|                                     |
|-------------------------------------|
| Variables not included in the model |
| miR_200c                            |
| miR_125a                            |

### Odds Ratios and 95% Confidence Intervals

| Variable  | Odds ratio | 95% CI           |
|-----------|------------|------------------|
| miR_21    | 1.0000     | 1.0000 to 1.0000 |
| miR_let7a | 1.0000     | 1.0000 to 1.0000 |
| miR_15b   | 1.0000     | 1.0000 to 1.0000 |

### Hosmer & Lemeshow test

|                    |            |
|--------------------|------------|
| Chi-squared        | 1.3189     |
| DF                 | 8          |
| Significance level | P = 0.9953 |
